# Supplementary material
Source: Springer Nature journal article supplement (https://www.springermedizin.de/resource/supplementary/12889_2011_3696_MOESM2_ESM.pdf/9489416)

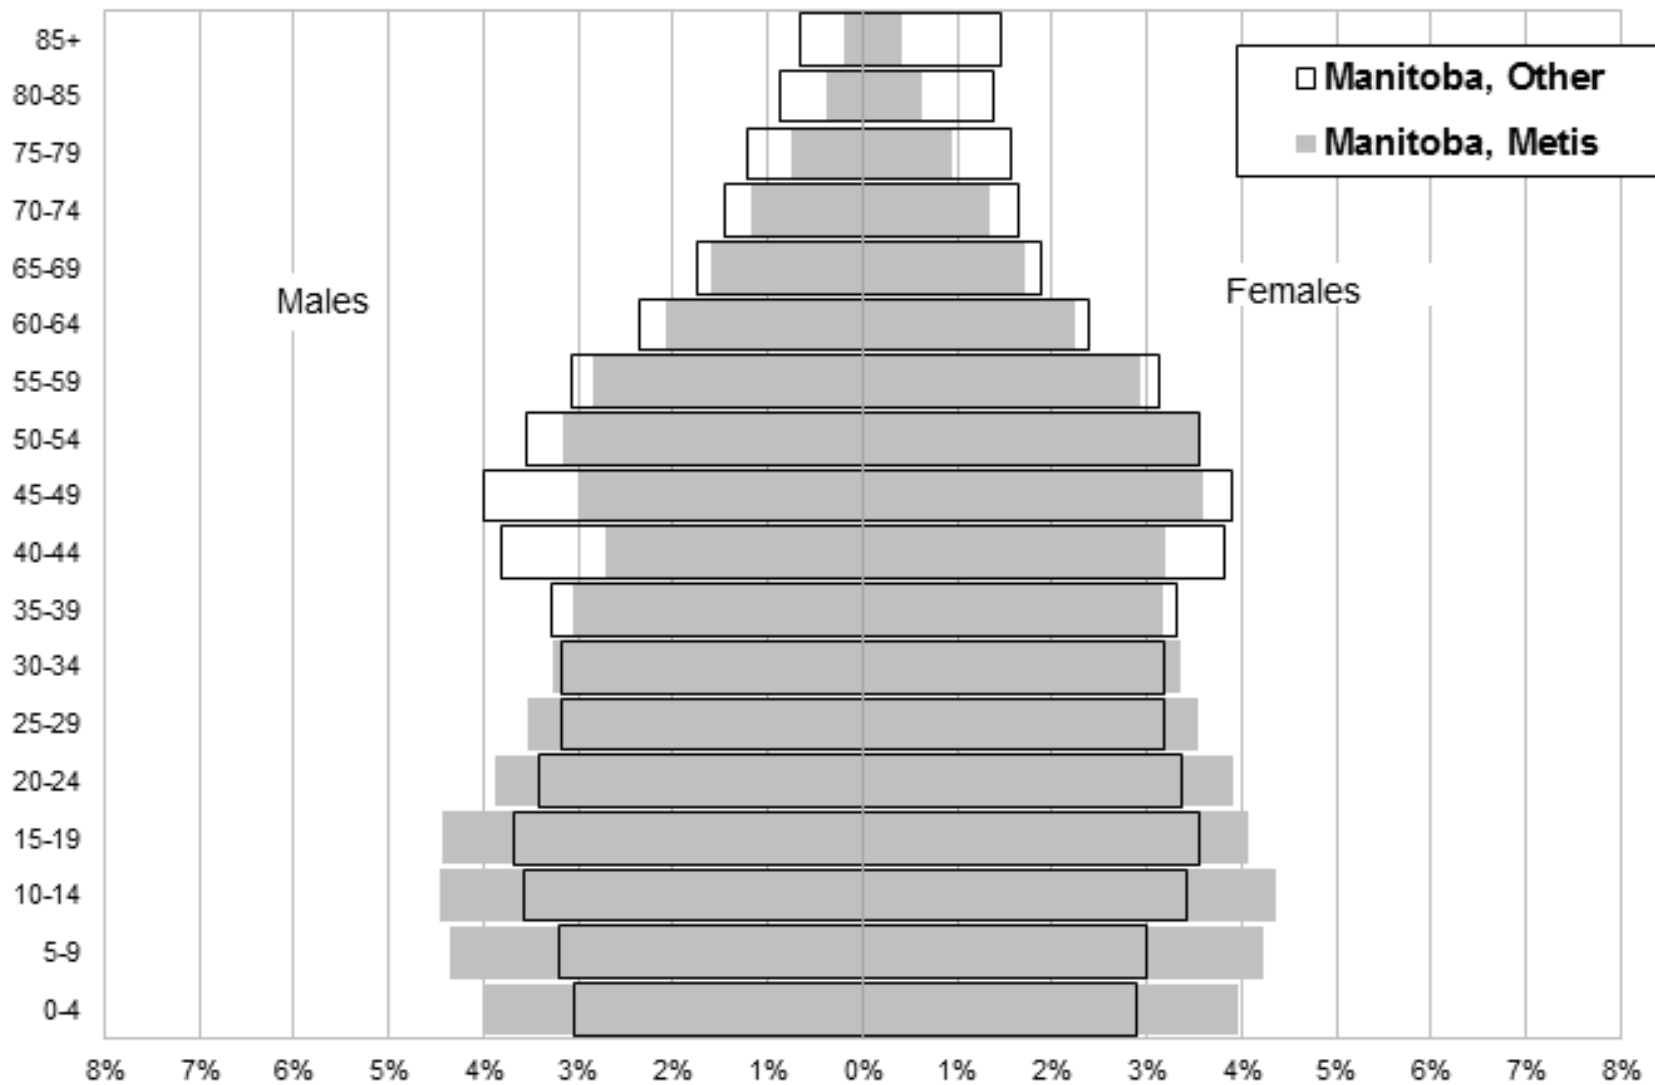

Supplement: MOESM2 [file 9489416]
